# Supplementary material
Source: HighWire-hosted journal article supplement (https://jnm.snmjournals.org/highwire/filestream/99554/field_highwire_adjunct_files/0/245803_Supplemental_Data.pdf)
Supplement: 245803_Supplemental_Data.pdf [file 245803_Supplemental_Data.pdf]

**Supplemental Table 1: Adverse events of pembrolizumab treatment**

| Body system                   | All adverse events |        | Adverse events attributed to pembrolizumab |        |
|-------------------------------|--------------------|--------|--------------------------------------------|--------|
|                               | All                | ≥ 3    | All                                        | ≥ 3    |
| <b>Respiratory tract</b>      | 3 (11%)            | 1 (4%) | 1 (4%)                                     | 1 (4%) |
| New or increasing dyspnea     | 2 (8%)             | -      | -                                          | -      |
| Pneumonitis                   | 1 (4%)             | 1 (4%) | 1 (4%)                                     | 1 (4%) |
| <b>Gastrointestinal tract</b> | 10 (37%)           | -      | 7 (26%)                                    | -      |
| Nausea                        | 5 (18%)            | -      | 5 (18%)                                    | -      |
| Dysphagia                     | 1 (4%)             | -      | -                                          | -      |
| Loss of appetite              | 2 (8%)             | -      | 2 (8%)                                     | -      |
| Constipation                  | 2 (8%)             | -      | -                                          | -      |
| <b>Hepatobiliary System</b>   | 1 (4%)             | -      | -                                          | -      |
| GOT increase                  | 1 (4%)             | -      | -                                          | -      |
| <b>Hematopoietic System</b>   | 4 (15%)            | 2 (8%) | 3 (11%)                                    | 2 (8%) |
| Anemia                        | 1 (4%)             | -      | -                                          | -      |
| Lymphopenia                   | 3 (11%)            | 2 (8%) | 3 (11%)                                    | 2 (8%) |
| <b>Endocrinologic System</b>  | 3 (11%)            | -      | 3 (11%)                                    | -      |
| Hypothyroidism                | 2 (8%)             | -      | 2 (8%)                                     | -      |
| Hyperthyroidism               | 1 (4%)             | -      | 1 (4%)                                     | -      |
| <b>Skin</b>                   | 2 (8%)             | -      | 2 (8%)                                     | -      |
| Exanthema                     | 2 (8%)             | -      | 2 (8%)                                     | -      |
| <b>Genitourinary System</b>   | 2 (8%)             | -      | -                                          | -      |
| Creatinine increase           | 2 (8%)             | -      | -                                          | -      |
| <b>Others</b>                 |                    |        |                                            |        |
| Fatigue                       | 2 (8%)             | 1 (4%) | 2 (8%)                                     | 1 (4%) |

**Supplemental Table 2: Response stratified by PD-L1 expression**

| Imaging Response                 | PD-L1 expression |                 |                  |                   | Fisher's exact test |
|----------------------------------|------------------|-----------------|------------------|-------------------|---------------------|
|                                  | 0%<br>(n=12)     | 1-49%<br>(n=11) | 50-100%<br>(n=3) | Overall<br>(n=26) |                     |
| <b>RECIST v1.1</b>               |                  |                 |                  |                   |                     |
| CR                               | 0 (0%)           | 0 (0%)          | 0 (0%)           | 0 (0%)            |                     |
| PR                               | 0 (0%)           | 2 (18.2%)       | 0 (0%)           | 2 (7.7%)          |                     |
| SD                               | 6 (50.0%)        | 5 (45.5%)       | 1 (33.3%)        | 12 (46.2%)        |                     |
| PD                               | 5 (41.7%)        | 4 (36.4%)       | 2 (66.7%)        | 11 (42.3%)        |                     |
| not evaluable                    | 1 (8.3%)         | 0 (0%)          | 0 (0%)           | 1 (3.8%)          | <i>P</i> =0.78      |
| <b>mRECIST</b>                   |                  |                 |                  |                   |                     |
| CR                               | 0 (0%)           | 0 (0%)          | 0 (0%)           | 0 (0%)            |                     |
| PR                               | 1 (8.3%)         | 1 (9.1%)        | 0 (0%)           | 2 (7.7%)          |                     |
| SD                               | 5 (41.7%)        | 5 (45.5%)       | 1 (33.3%)        | 11 (42.3%)        |                     |
| PD                               | 5 (41.7%)        | 5 (45.5%)       | 2 (66.7%)        | 12 (46.2%)        |                     |
| not evaluable                    | 1 (8.3%)         | 0 (0%)          | 0 (0%)           | 1 (3.8%)          | <i>P</i> =1.00      |
| <b>PERCIST<sub>SULpeak</sub></b> |                  |                 |                  |                   |                     |
| CMR                              | 0 (0%)           | 1 (9.1%)        | 0 (0%)           | 1 (3.8%)          |                     |
| PMR                              | 4 (33.3%)        | 2 (18.2%)       | 0 (0%)           | 6 (23.1%)         |                     |
| SMD                              | 6 (50.0%)        | 2 (18.2%)       | 2 (66.7%)        | 10 (38.5%)        |                     |
| PMD                              | 2 (16.7%)        | 6 (54.5%)       | 1 (33.3%)        | 9 (34.6%)         | <i>P</i> =0.23      |
| <b>PERCIST<sub>MTV</sub></b>     |                  |                 |                  |                   |                     |
| CMR                              | 0 (0%)           | 0 (0%)          | 0 (0%)           | 0 (0%)            |                     |
| PMR                              | 3 (25.0%)        | 3 (27.3%)       | 1 (33.3%)        | 7 (26.9%)         |                     |
| SMD                              | 2 (16.7%)        | 4 (36.4%)       | 0 (0%)           | 6 (23.1%)         |                     |
| PMD                              | 7 (58.3%)        | 4 (36.4%)       | 2 (66.7%)        | 13 (50.0%)        | <i>P</i> =0.72      |

*RECIST v1.1 = Response Evaluation Criteria in Solid Tumors Version 1.1; mRECIST = Revised Modified Response Evaluation Criteria in Solid Tumors for Assessment of Response in Malignant Pleural Mesothelioma Version 1.1; PERCIST<sub>SULpeak</sub> = PET Response Criteria in Solid Tumors; PERCIST<sub>MTV</sub> = PET Response Criteria in Solid Tumors using metabolic tumor volume as marker of response.*

**Supplemental Figure 1: Patient recruitment**

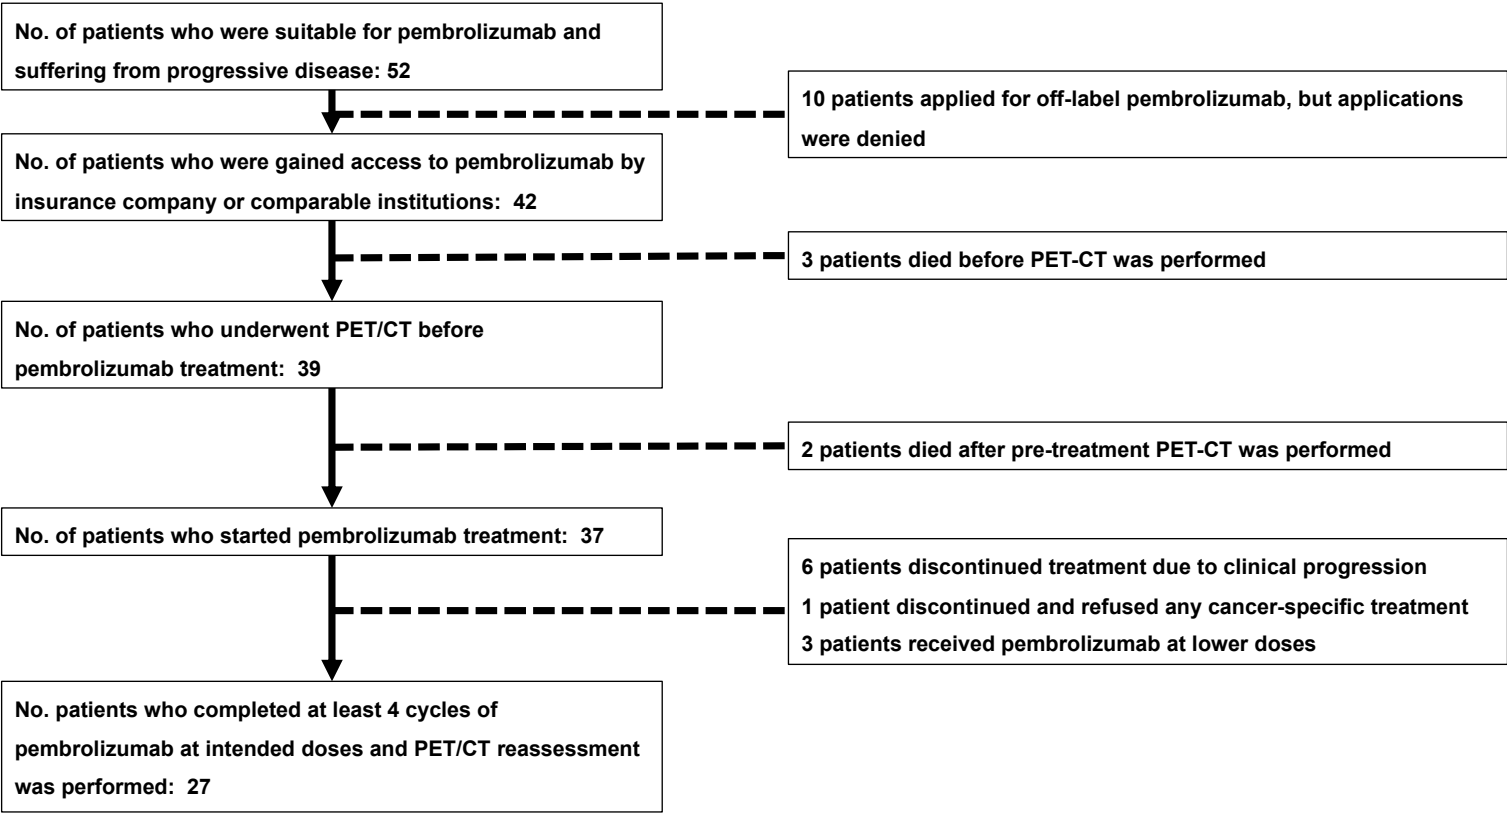

**Supplemental Figure 2: Progression free survival stratified by response using different response criteria**

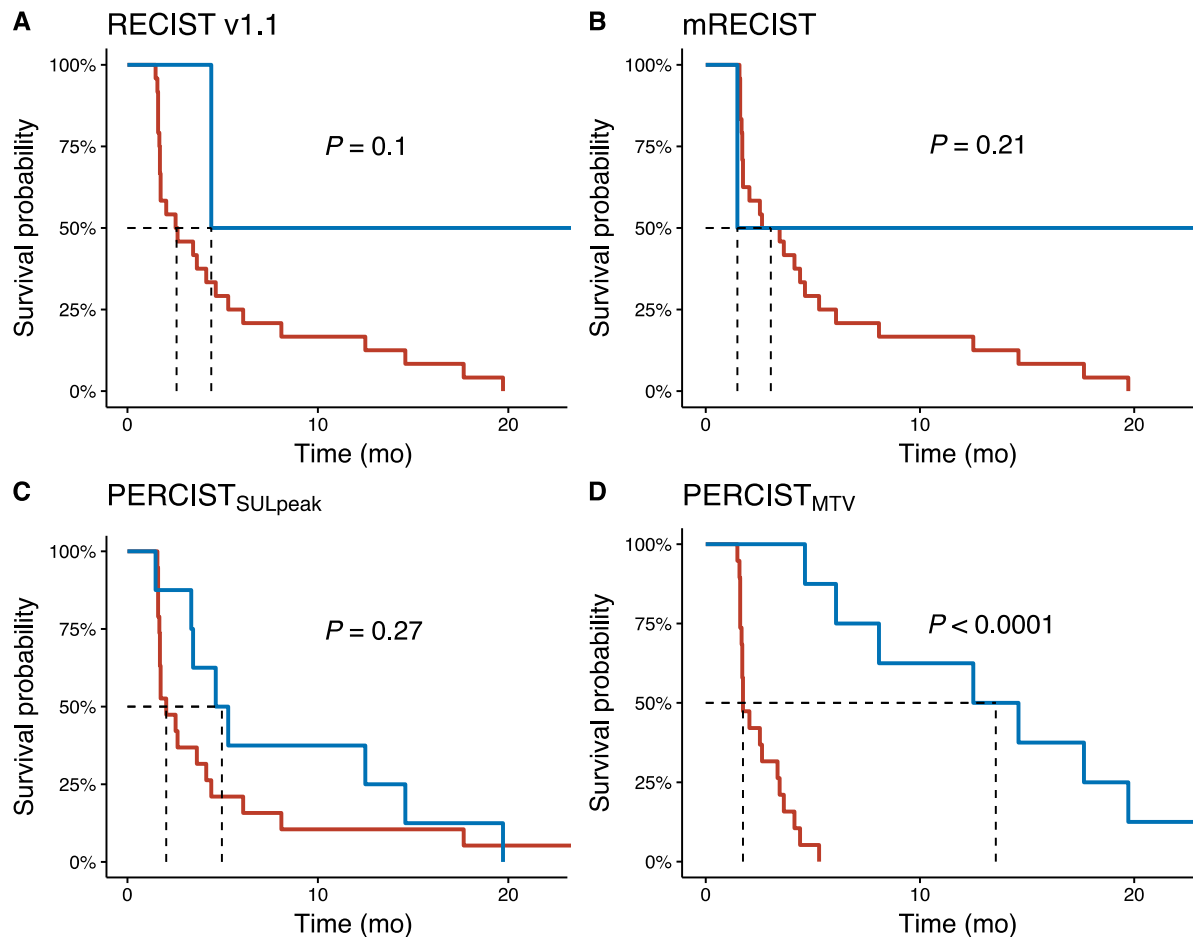

Progression free survival (PFS) stratified by responders (blue) and non-responders (red) identified by different response assessment criteria. Log-rank test revealed that only PERCIST<sub>MTV</sub> responders (D) showed significantly longer PFS compared to non-responders (median 1.7 vs. 13.5 months). *RECIST v1.1* = Response Evaluation Criteria in Solid Tumors Version 1.1; *mRECIST* = Revised Modified Response Evaluation Criteria in Solid Tumors for Assessment of Response in Malignant Pleural Mesothelioma Version 1.1; *PERCIST<sub>SULpeak</sub>* = PET Response Criteria in Solid Tumors; *PERCIST<sub>MTV</sub>* = PET Response Criteria in Solid Tumors using metabolic tumor volume as marker of response.

**Supplemental Figure 3: Progression free survival and overall survival stratified by PD-L1 Expression**

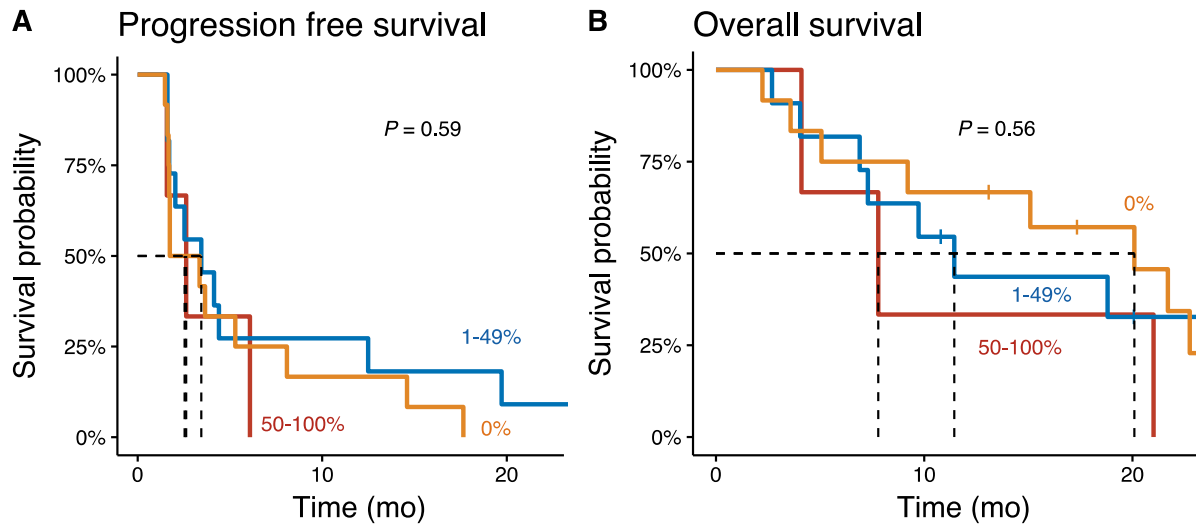

(A) Progression free survival and (B) overall survival stratified by PD-L1 expression.
